# Supplementary material
Source: PubMed Central journal article supplement (PMC3137257)
Supplement: supp_jn.110.136739_nut_136739_F1.pdf [file supp_jn.110.136739_nut_136739_F1.pdf]

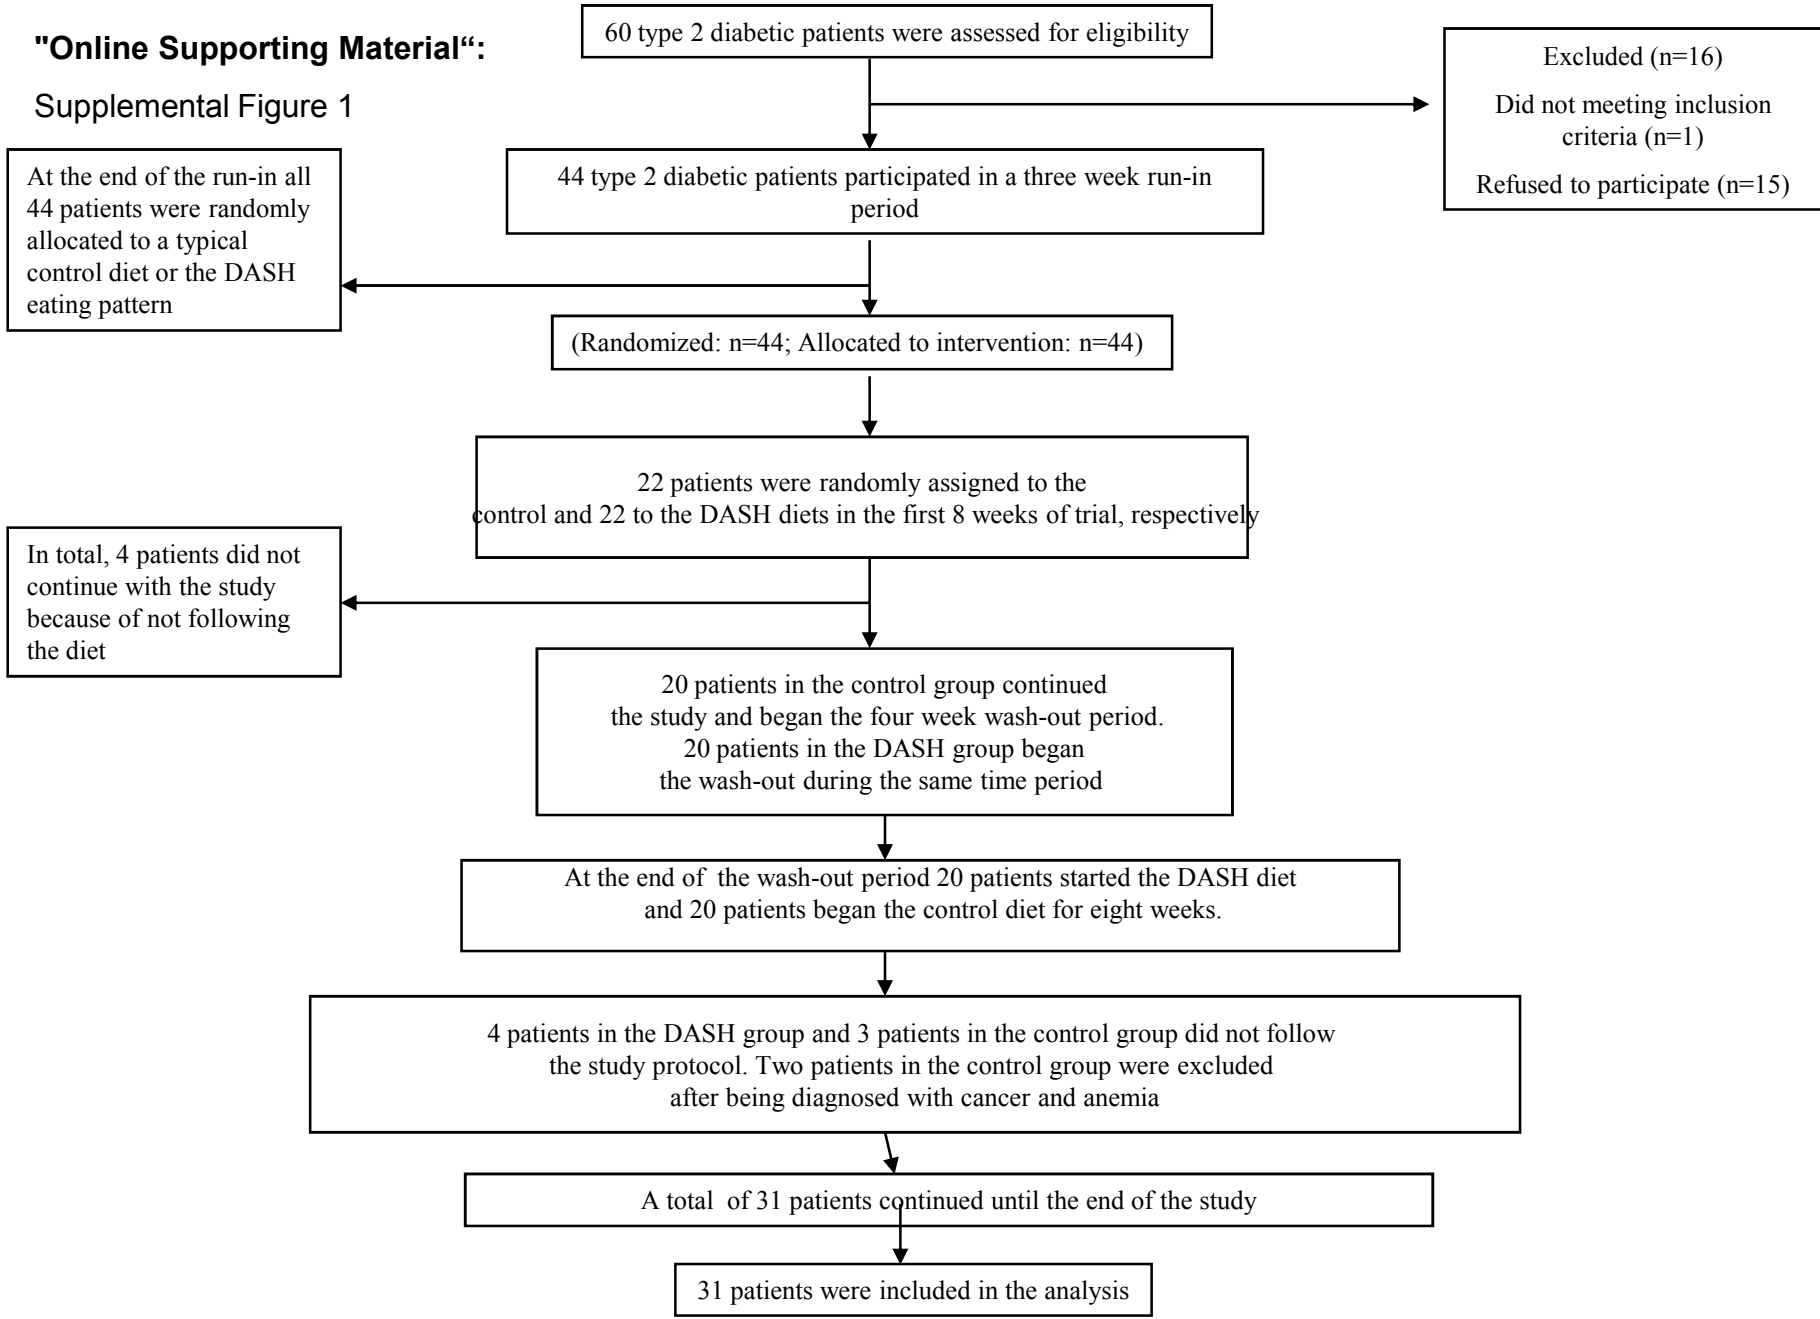

**Legend to Figure 1:** Flow diagram: Clinical trial of the DASH eating plan on cardiovascular risk among type 2 diabetic patients. The diagram includes detailed information about the intervention.
